# Supplementary material for: Designing &amp; Printing Dispersion Strengthened Ti-6Al-4V via Laser Powder Bed Fusion Additive Manufacturing
Source: Research Square preprint supplement (doi:10.21203/rs.3.rs-8594974/v1), 2026-01-29
Supplement: Supplementary file 1 [file 6cd93b1398cb99f32edde630.docx]

**Supplementary Material for Designing & Printing Dispersion Strengthened Ti-6Al-4V via Laser Powder Bed Fusion Additive Manufacturing**

Venkata Satya Surya Amaranth Karra1,*, Tirthesh Ingale2, Sivaji Karna1, Shreya Mukherjee2, Ravi Sankar Haridas2, Rajarshi Banerjee2, Anthony D. Rollett3, Rajiv S Mishra2, and Hector R. Siller1,*

1Department of Mechanical Engineering, University of North Texas, Denton, TX 76207
2Department of Materials Science and Engineering, University of North Texas, Denton, TX 76207
3Department of Materials Science and Engineering, Carnegie Mellon University, Pittsburgh, PA 15213

*Corresponding authors: Amaranth.Karra@unt.edu ; [hector.siller@unt.edu](mailto:hector.siller@unt.edu)

**Scanning Electron Microscopy**

**
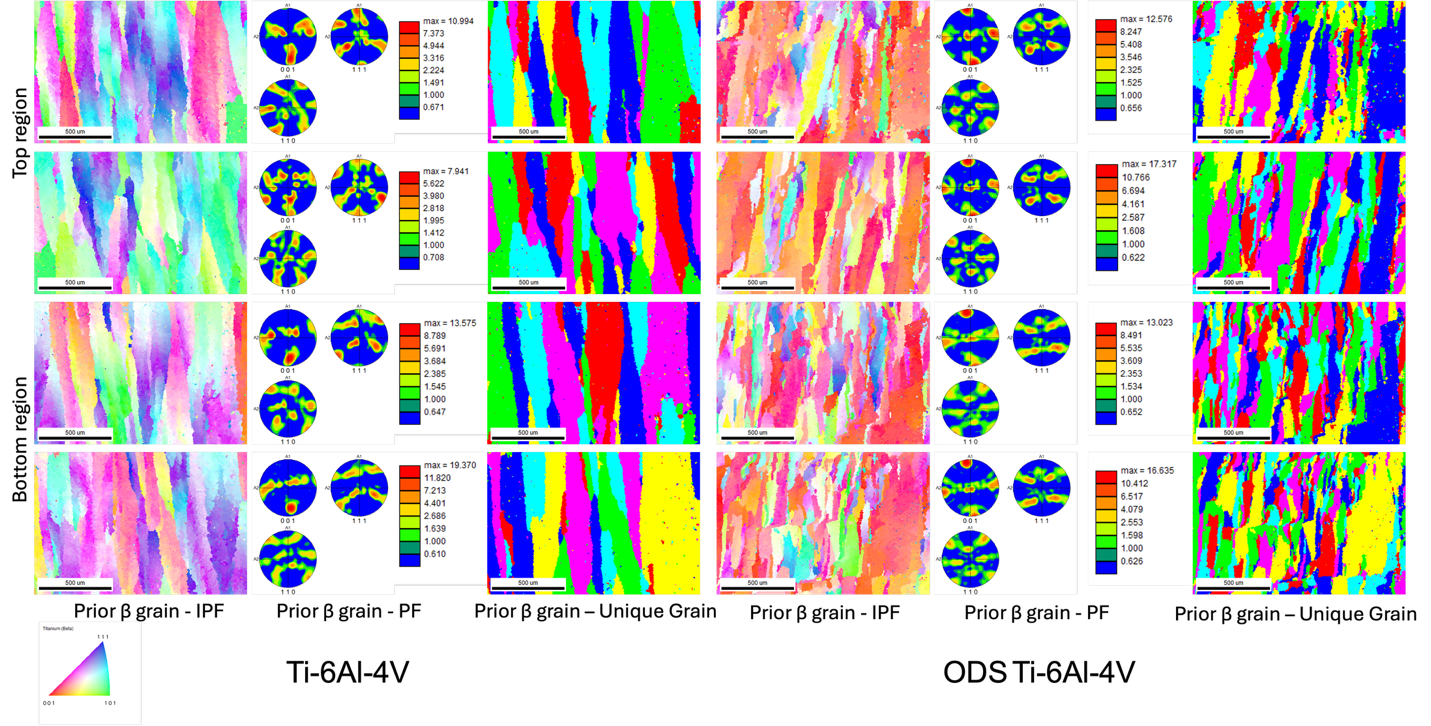
**

**Figure S1:** Different regions of Ti-6Al-4V and ODS Ti-6Al-4V showing IPF, PF and Unique grain of the reconstructed prior β grains showing difference in grain size.

**
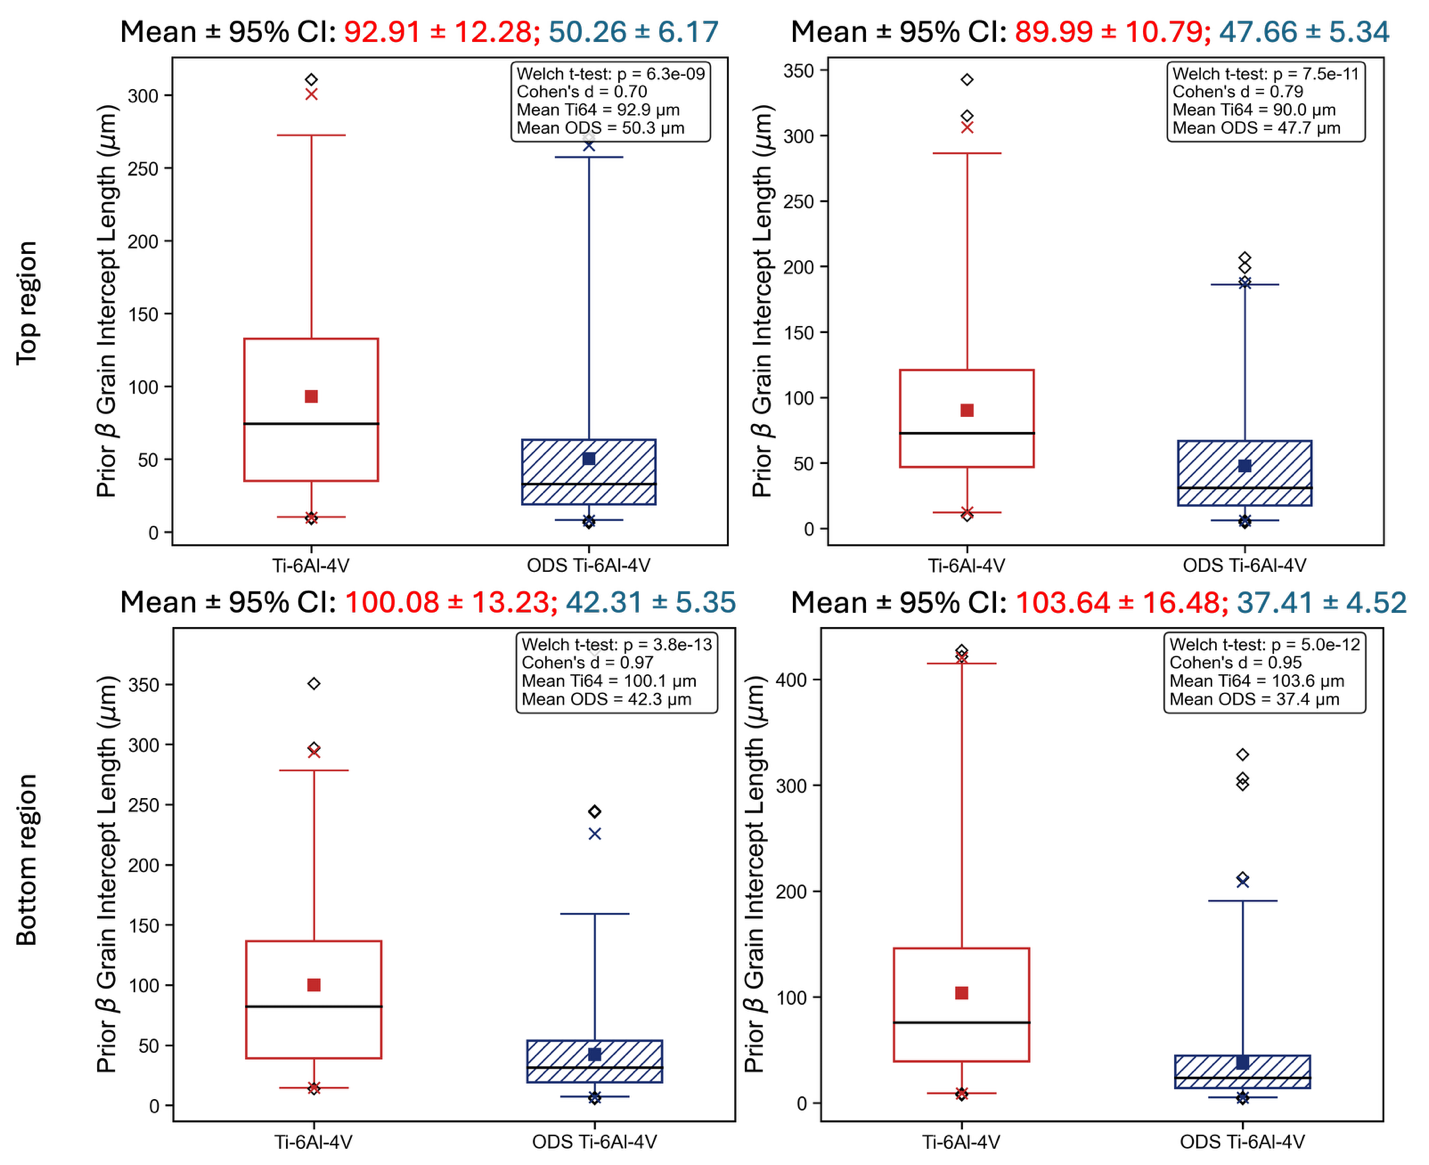
**

**Figure S2:** Prior β grain intercept length as calculated from the methods described in the paper. ODS Ti-6Al-4V consistently shows lower mean ± 95% CI for different regions shown in Figure S1.


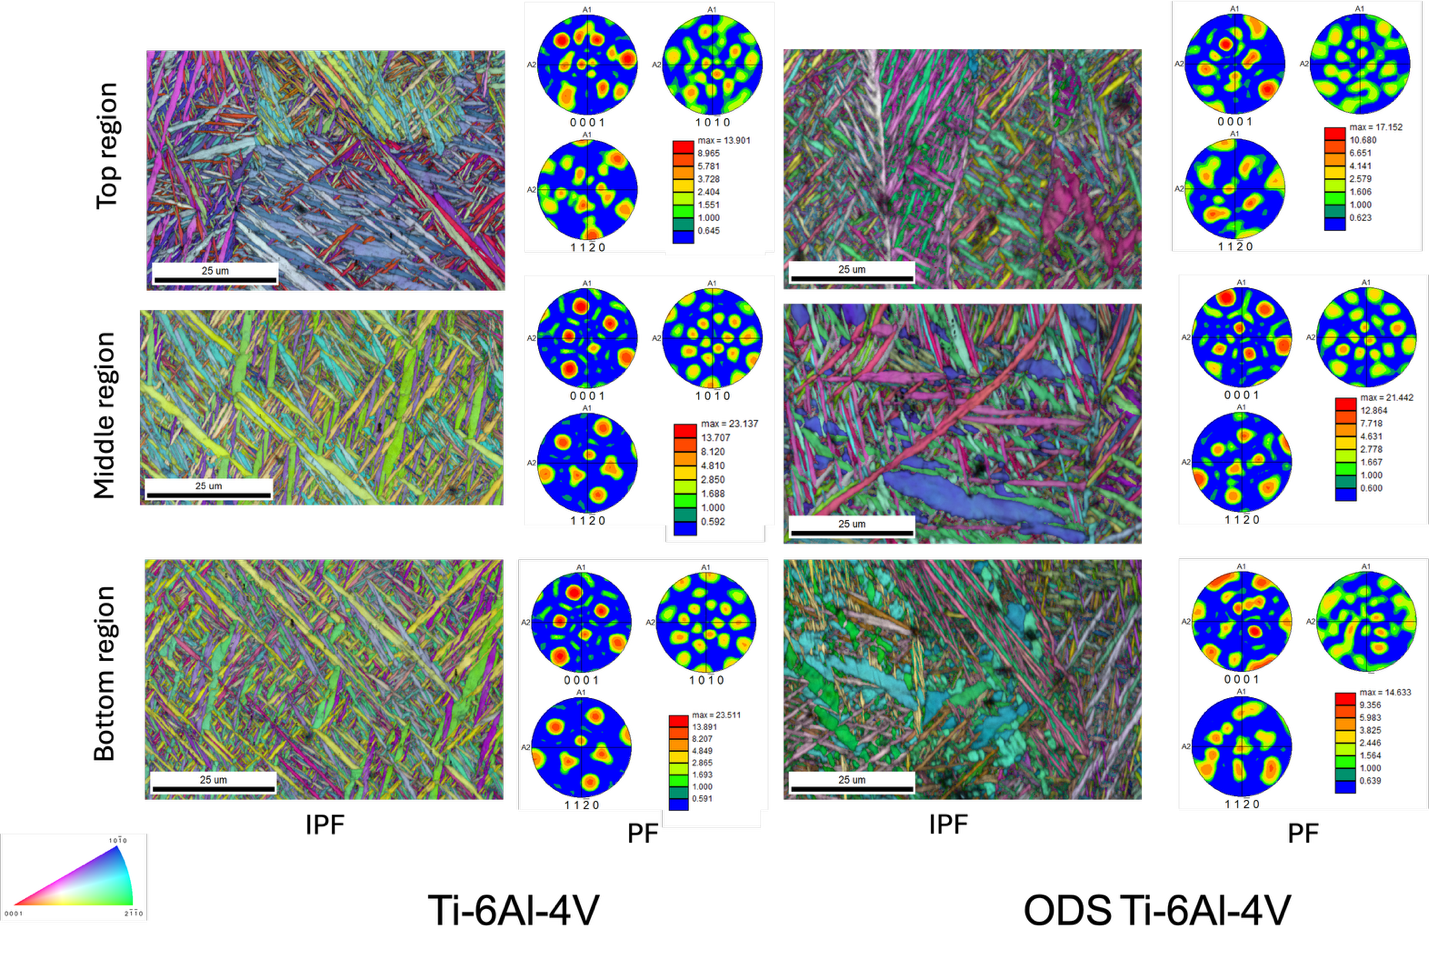


**Figure S3:** Different regions of Ti-6Al-4V and ODS Ti-6Al-4V showing IPF and PF maps showing all the alpha variants within the Ti-6Al-4V owing to the lack of bias in {0001} pole figure.
